# Supplementary material for: A new method for the study of G-quadruplex ligands
Source: Royal Society of Chemistry journal article supplement (doi:10.1039/b804627a), 2008-01-01
Supplement: b804627a.pdf [file b804627a.pdf]

## A new method for the study of G-quadruplex ligands

De-Ming Kong,\* Jing Wu, Yong-E Ma, and Han-Xi Shen

### 1. Experimental Section

#### 1.1 Materials

The DNA oligonucleotides AG4: 5'-TG<sub>3</sub>TAG<sub>3</sub>CG<sub>3</sub>TTG<sub>3</sub>AAA-3' and Hum24: 5'-(TTAGGG)<sub>4</sub>-3' were obtained from TianGen Biotech Co. Ltd (Beijing China), The G-quadruplex molecular beacon F22D: FAM-AGGG(TTAGGG)<sub>3</sub>-DABCYL was synthesized and purified by Invitrogen Ltd. (Shanghai, China). All other chemicals were purchased commercially and used without further purification unless otherwise noted.

#### 1.2 Screening studies of G-quadruplex binders

All experiments were performed in 10 mM Tris-HCl buffer solution, pH=8.0, that included 1.6 mM KCl, 0.8 mM MgCl<sub>2</sub>, 0.0017% (v/v) Triton X-100, 0.90 μM AG4, 0.50 μM hemin, and different concentrations of candidate drugs. The reaction mixtures were held overnight in ambient temperature, then 1.28 mM of ABTS and 1.28 mM of H<sub>2</sub>O<sub>2</sub> were added. The color of the reaction mixture was recorded by a digital camera. Densitometric quantitation of the photographed images was performed by Glyko BandScan software, Version 4.30.

#### 1.3 G-quadruplex stabilizing abilities assays

Thermal melting studies of G-quadruplex in the presence or absence of the candidate drugs were carried out on Rotor-Gene 3000 (Corbett Research) with 100  $\mu\text{L}$  of reaction mixture (10 mM Tris-HCl buffer (pH 8.0), 100 mM NaCl, 0.5  $\mu\text{M}$  F22D and an appropriate concentration of the candidate drug). The temperature was increased in steps of 1  $^{\circ}\text{C}$ , from 30  $^{\circ}\text{C}$  to 95  $^{\circ}\text{C}$ , with the first step lasting 30 s and the remaining steps each lasting 5 s. Fluorescence was measured at each step.

## 2. Selection of hemin concentration

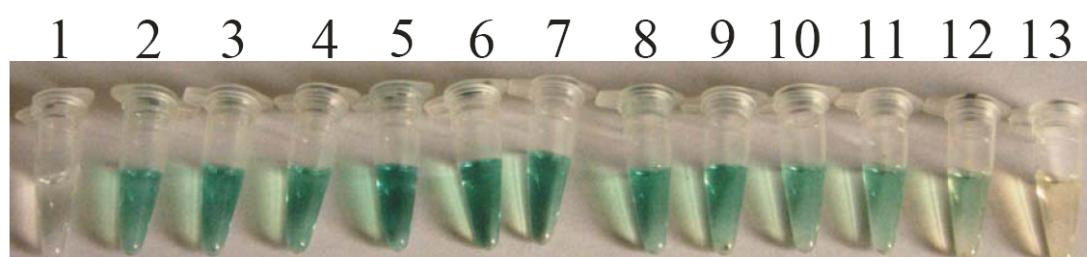

**Figure S1.** Oxidation of ABTS by  $\text{H}_2\text{O}_2$  in presence of AG4 and different concentration of hemin. 0, 0.1, 0.2, 0.3, 0.4, 0.5, 0.6, 0.7, 0.8, 0.9, 1.0, 2.0, 3.0  $\mu\text{M}$  hemin was added in tube 1-13, respectively.

## 3. Selection of AG4 concentration

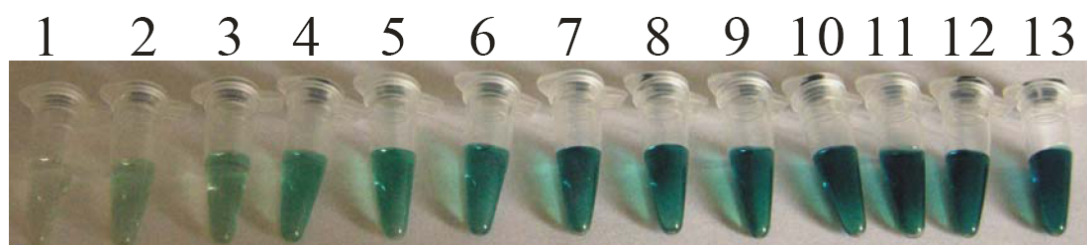

**Figure S2.** Oxidation of ABTS by  $\text{H}_2\text{O}_2$  in presence of hemin and different concentration of AG4. 0, 0.1, 0.2, 0.3, 0.4, 0.5, 0.7, 0.9, 1.1, 1.3, 1.5, 1.7, 2.1  $\mu\text{M}$  AG4

was added in tube 1-13, respectively.

#### 4. Selection of ABTS concentration

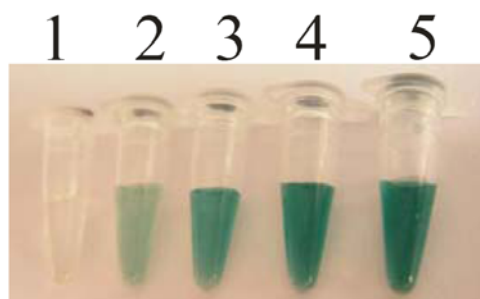

**Figure S3.** Oxidation of different concentration of ABTS by  $\text{H}_2\text{O}_2$  in presence of AG4-hemin complex. 0, 0.32, 0.64, 1.28, 1.92 mM ABTS was added in tube 1-5, respectively.

#### 5. Candidate drugs used for screening experiments.

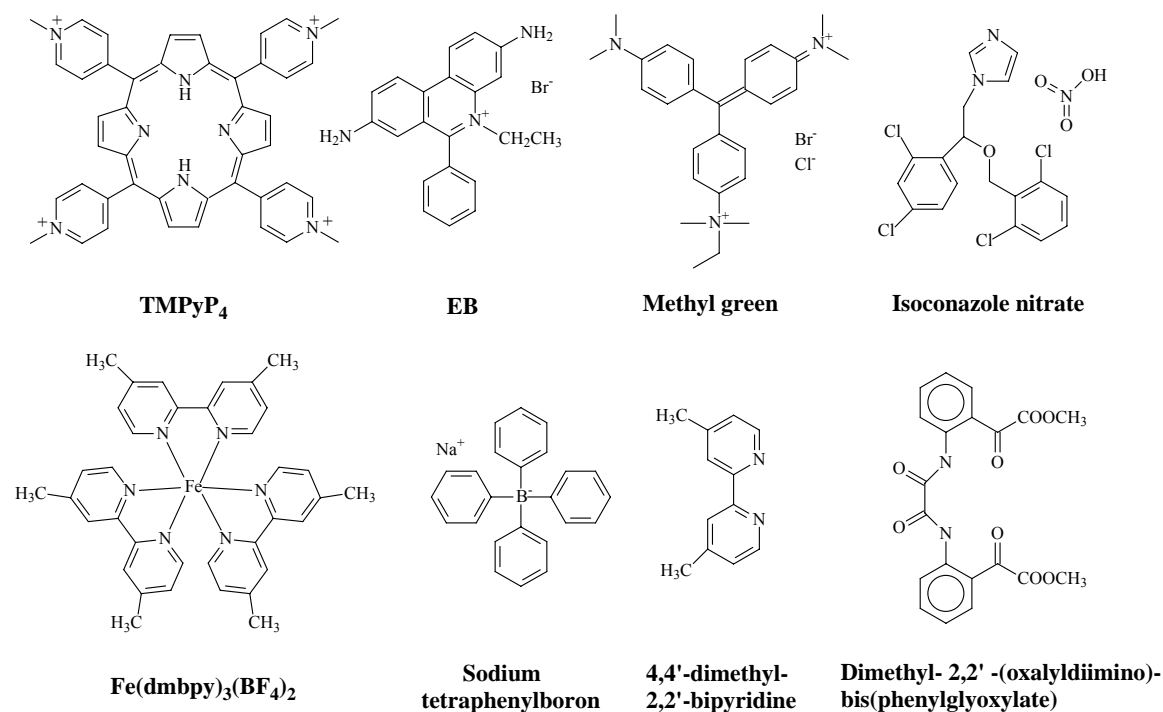

**Figure S4.** Candidate drugs used for screening experiments.

### 5. Respective results of fluorescence tests.

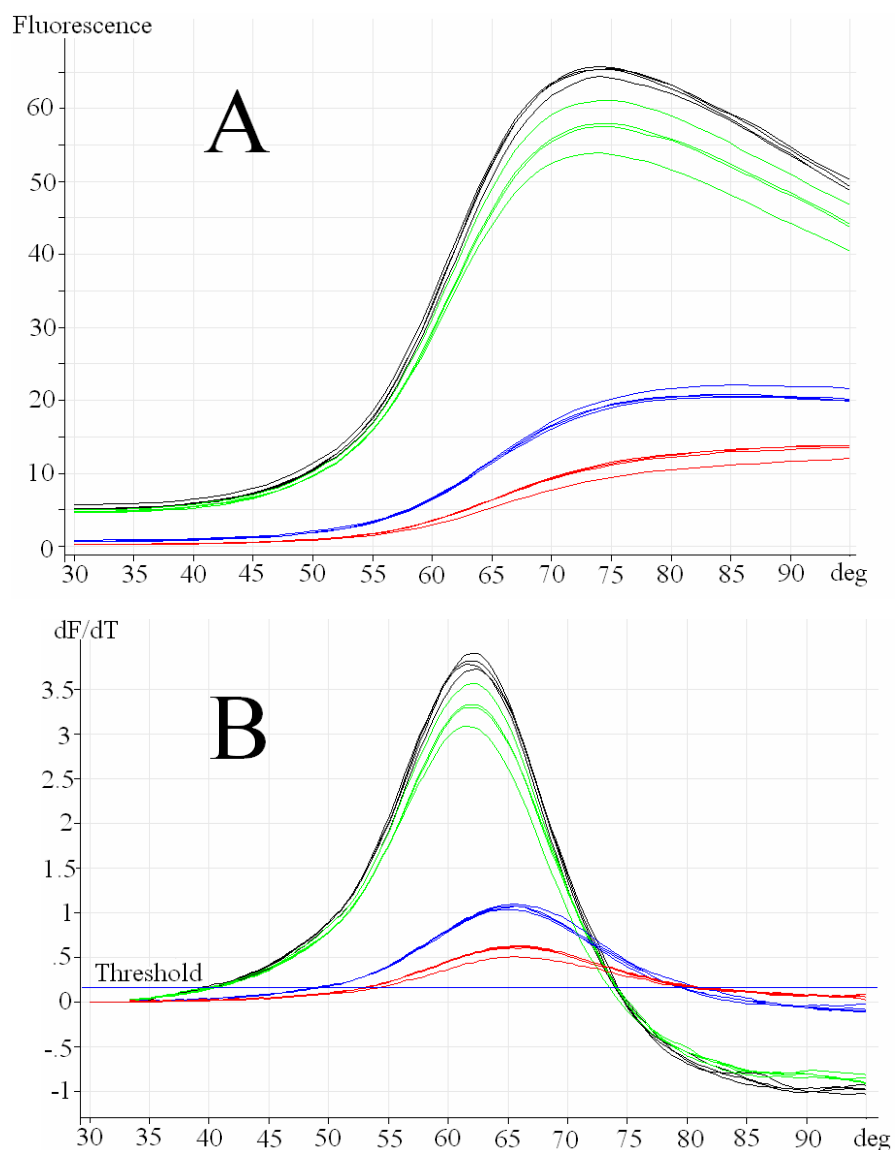

**Figure S5.** Stabilization of F22D in the presence of TMPyP4 or Fe(dmbpy)<sub>3</sub>(BF<sub>4</sub>)<sub>2</sub>.

(A) The thermal denaturation profile of F22D recorded alone (black) or in the presence of TMPyP4 (blue, 2 μM; red, 3 μM) or Fe(dmbpy)<sub>3</sub>(BF<sub>4</sub>)<sub>2</sub> (green, 25 μM).

(B) First derivative of the melting curves.
